# Supplementary material for: Two azobenzene derivatives CAB/ACB as reusable sunscreen: UV absorptive capacity and biosafety evaluation
Source: Royal Society of Chemistry journal article supplement (doi:10.1039/c7ra10290a), 2018-01-01
Supplement: c7ra10290a1.pdf [file c7ra10290a1.pdf]

## **Supporting Information**

### **Two azobenzene derivatives CAB/ACB as reusable sunscreen: UV absorptive capacity and biosafety evaluation**

**Jiao-Li Liu<sup>1</sup>, Satoshi Wada<sup>2</sup>, Jin-Ye Wang<sup>1\*</sup>**

<sup>1</sup>School of Biomedical Engineering, Shanghai Jiaotong University, 800 Dongchuan Road, Shanghai, 200240, China.

<sup>2</sup>Advanced Photonics Center, RIKEN, Hirosawa 2-1, Wako, Saitama, 351-0198 Japan.

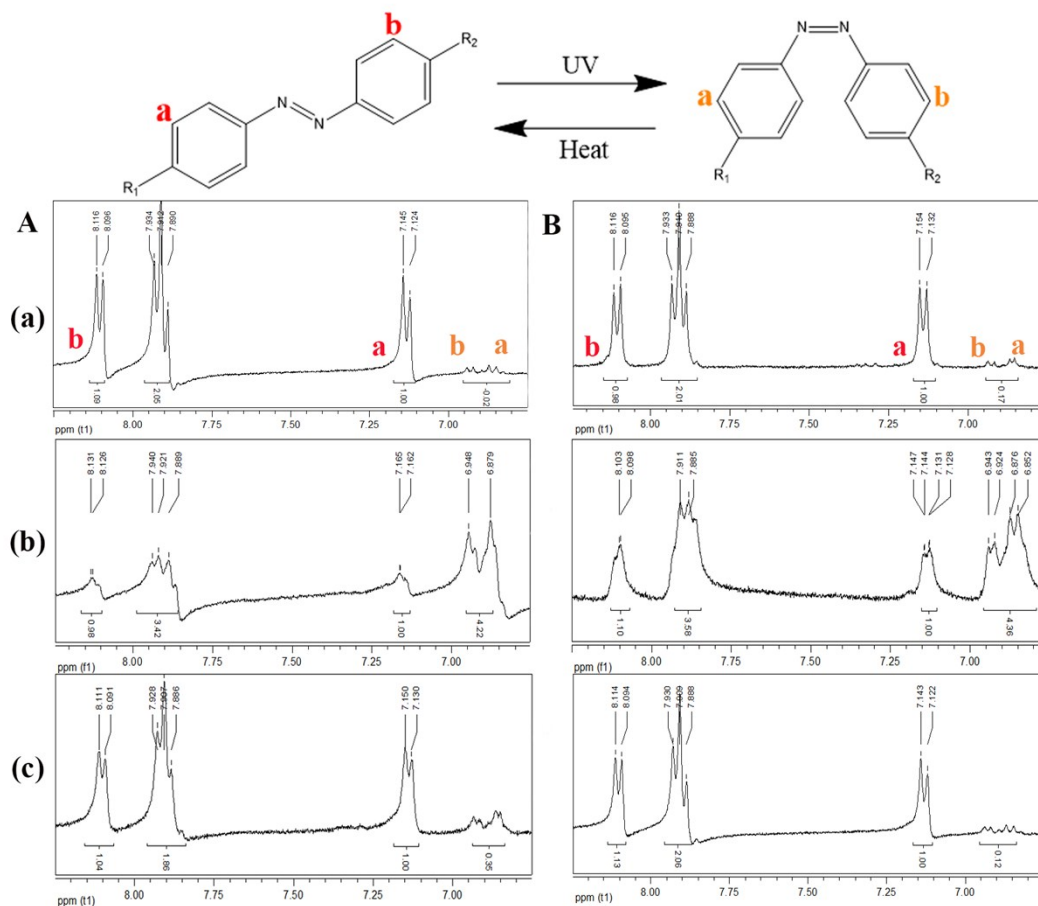

**Fig. S1.** <sup>1</sup>H NMR spectra of CAB(A)/ACB(B) before UV irradiation(a), after UV irradiation (b) and heating (c).

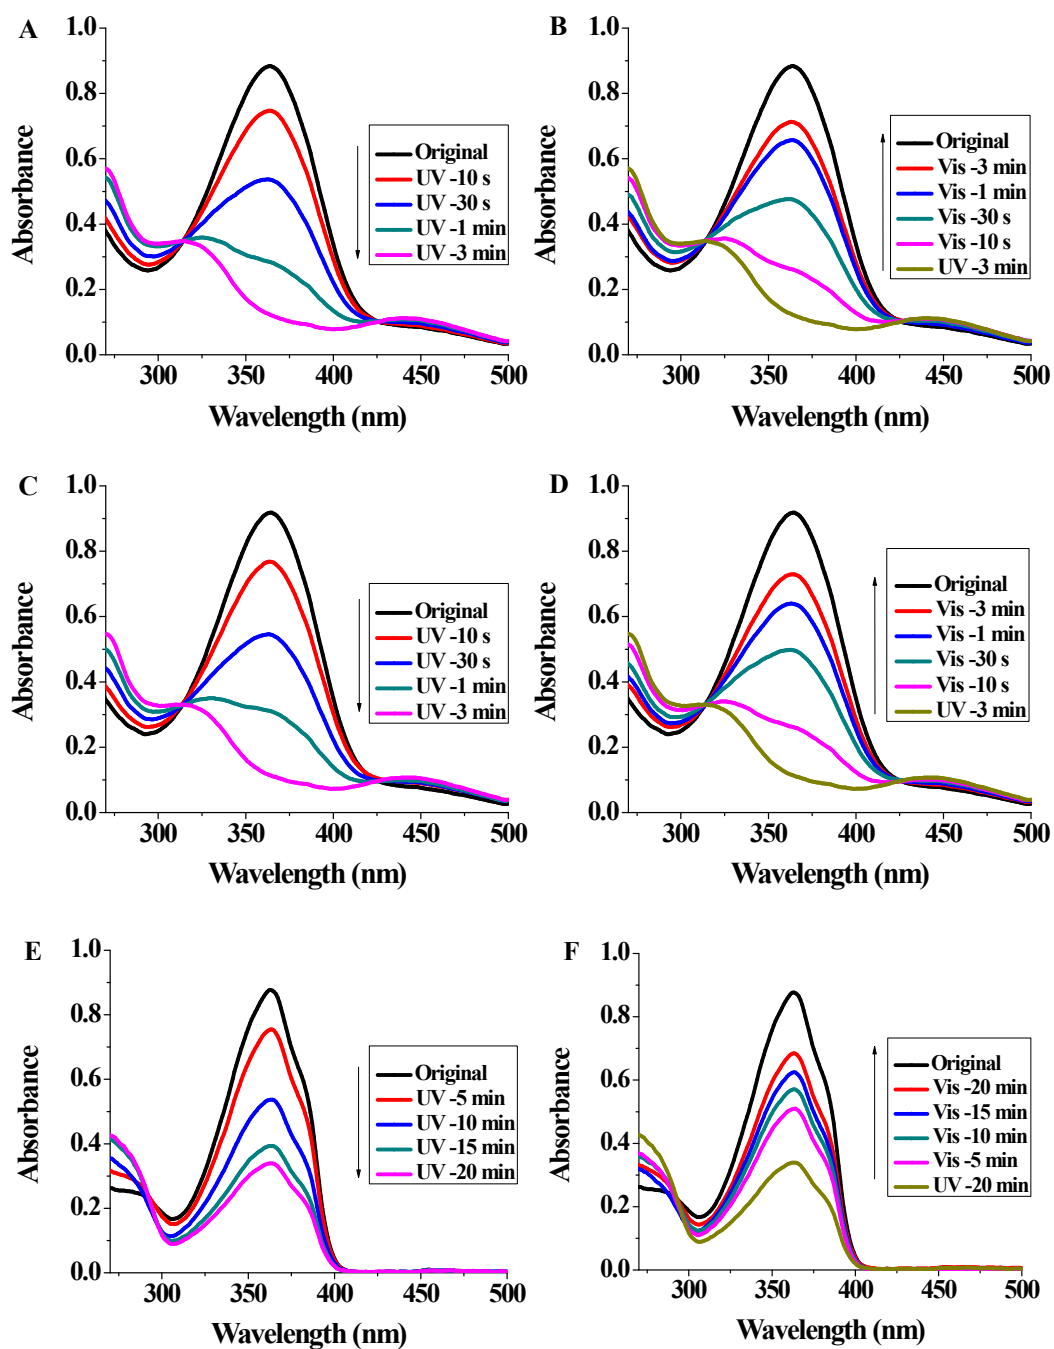

**Fig. S2.** The *trans-cis* spectral changes of ACB (A), CAB (C) and AVO (E) in DMSO under 365 nm irradiation, and the *cis-trans* spectral changes of ACB (B), CAB (D) and AVO (F) in DMSO under 420 nm irradiation.

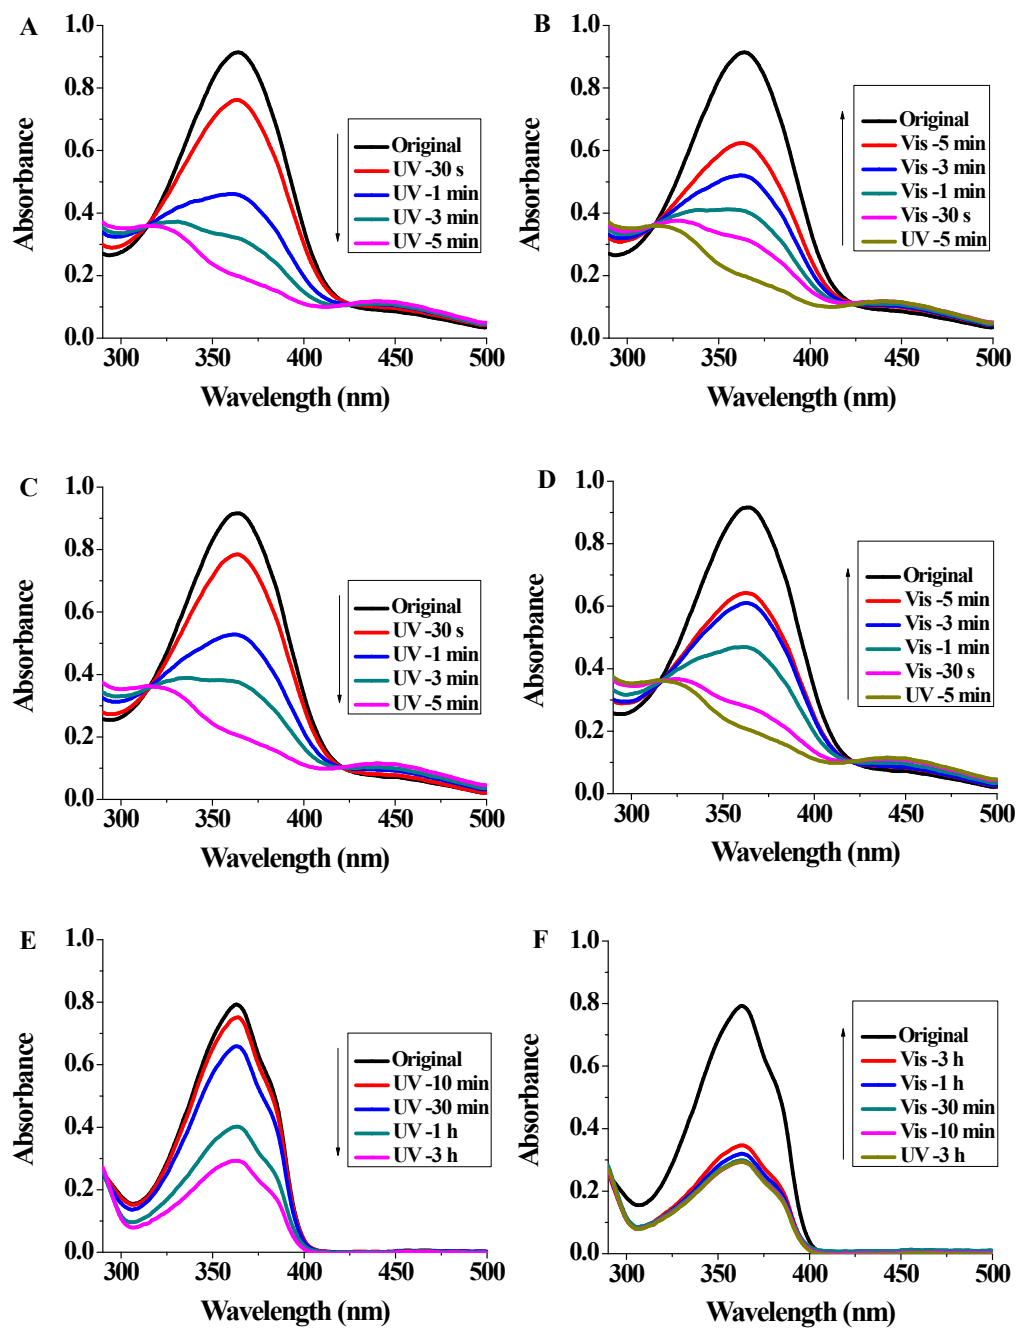

**Fig. S3.** The *trans-cis* spectral changes of ACB (A), CAB (C) and AVO (E) in cream under 365 nm irradiation, and the *cis-trans* spectral changes of ACB (B), CAB (D) and AVO (F) in cream under 420 nm irradiation.

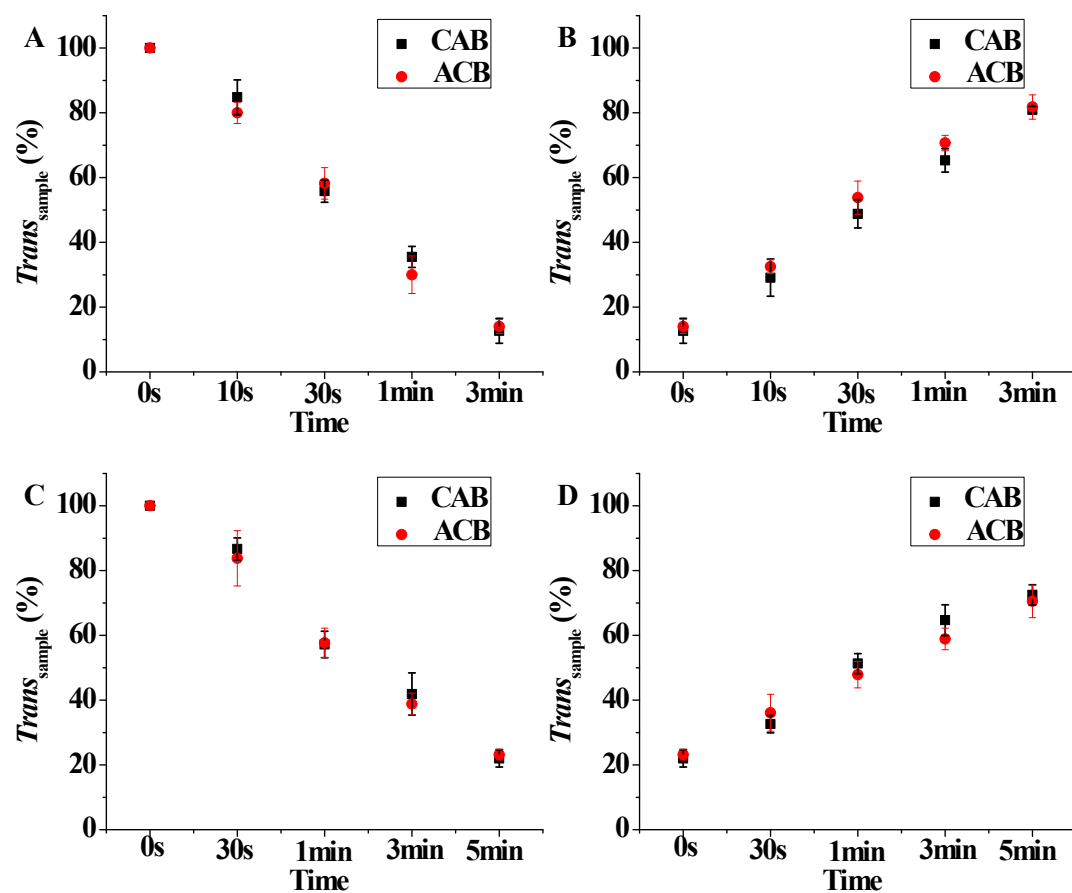

**Fig. S4.** The reversible *trans*-to-*cis* isomerization degree (A, C) and *cis*-to-*trans* isomerization degree (B, D) of ACB and CAB in DMSO (A, B) and in cream (C, D). (%  $trans_{\text{sample}} = [(Abs_{365\text{nm}})_{\text{sample}} / (Abs_{365\text{nm}})_{\text{dark}}] \times 100$ ) (n=3).

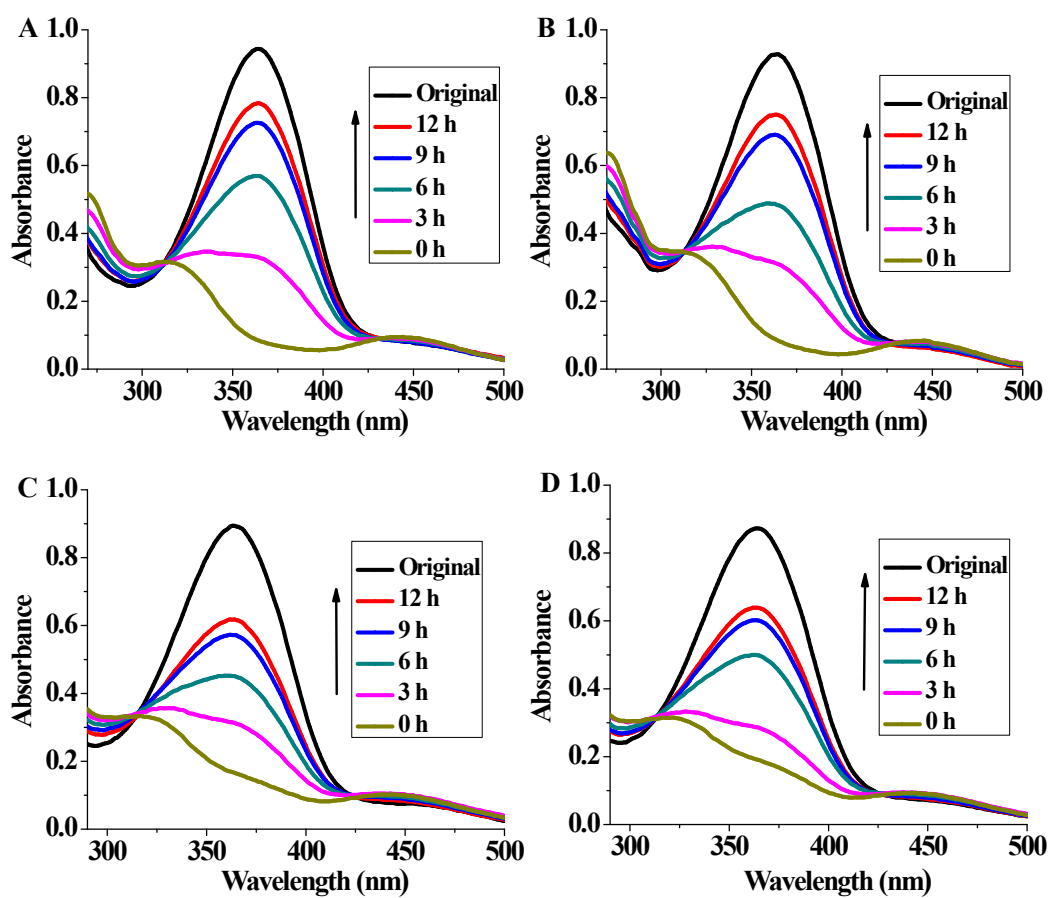

**Fig. S5.** The *cis*-to-*trans* spectral changes of ACB (A) and CAB (B) in DMSO, and the *cis*-to-*trans* spectral changes of ACB (C) and CAB (D) in cream in the dark at 37 °C.

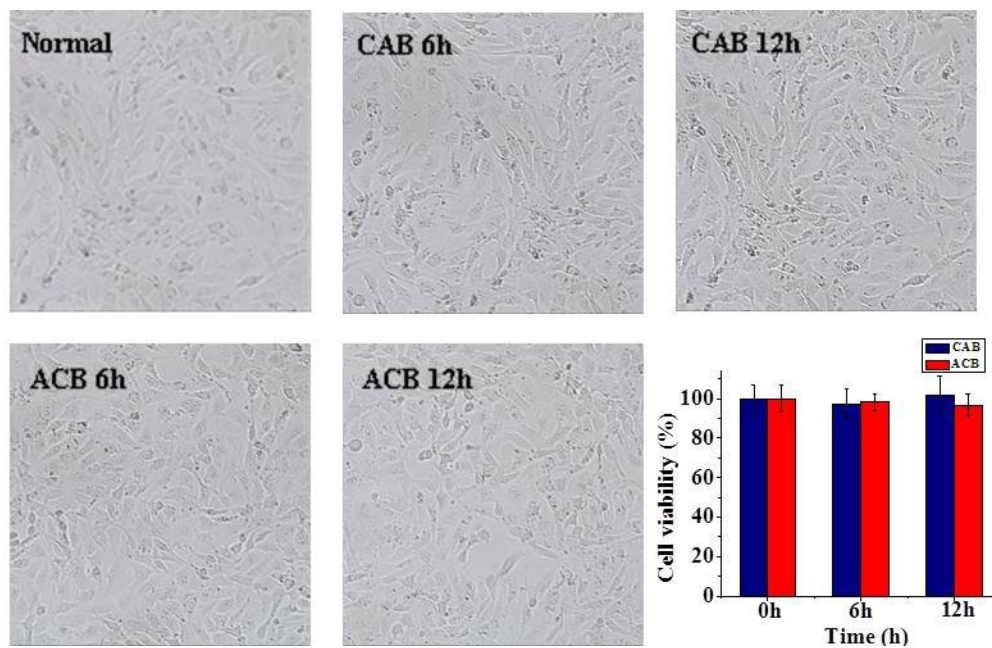

**Fig. S6.** The phase contrast microscopy images and viability histogram of cells interact with CAB and ACB for different times (n=6).
